# Supplementary material for: Integrase Strand Transfer Inhibitors Are Effective Anti-HIV Drugs
Source: MDPI journal article supplement (doi:10.3390/v13020205), 2021-01-29
Supplement: s1 [file s1]

**Table S1.** Current recommendations for HIV-1 treatments with INSTIs. The recommended INSTI treatment strategies for most ARV naïve or ARV-experienced, INSTI naïve HIV-1 patients are shown at the top of the table. The recommended treatment strategies for most ARV naïve or ARV-experienced, INSTI-naïve in certain clinical settings are given in the middle panel. The treatment strategies for most suppressed HIV-1 patients undergoing maintenance therapy are shown in the bottom panel.

| INSTI Treatment Strategies for Most ARV Naïve or ARV-Experienced, INSTI Naïve, HIV-1 Patients |                                                                                   |                        |                                                                                                                        |
|-----------------------------------------------------------------------------------------------|-----------------------------------------------------------------------------------|------------------------|------------------------------------------------------------------------------------------------------------------------|
| Name                                                                                          | ARV Drugs Formulated into Fixed Dose Combinations                                 | Dosing Recommendation  | Adverse Events                                                                                                         |
| Biktarvy                                                                                      | Bictegravir (50 mg)/tenofovir alafenamide (25 mg)/emtricitabine (200 mg)          | One tablet once daily  | Diarrhea, nausea, headache, weight gain                                                                                |
| Triumeq                                                                                       | Dolutegravir (50 mg)/abacavir (600 mg)/lamivudine (300 mg)                        | One tablet once daily  | Insomnia, headache, weight gain, hepatotoxicity, depression, slightly increased risk of neural tube defects in infants |
| Dovato*                                                                                       | Dolutegravir (50 mg)/lamivudine (300 mg)                                          | One tablet once daily  | Insomnia, headache, weight gain, hepatotoxicity, depression, slightly increased risk of neural tube defects in infants |
| Isentress plus Truvada                                                                        | Raltegravir (400mg)/tenofovir disoproxil fumarate (300 mg)/emtricitabine (200 mg) | Two tablets daily      | Nausea, weight gain, insomnia, depression, rash                                                                        |
| Isentress HD plus Truvada                                                                     | Raltegravir (600mg)/tenofovir disoproxil fumarate (300 mg)/emtricitabine (200 mg) | Two tablets once daily | Nausea, weight gain, insomnia, depression, rash                                                                        |
| *only for individuals with HIV RNA ≤500,000 copies/mL                                         |                                                                                   |                        |                                                                                                                        |

| INSTI Treatment Strategies for Most ARV Naïve or ARV-Experienced, INSTI-Naïve HIV-1 Patients in Certain Clinical Settings |                                                                                                         |                                 |                              |
|---------------------------------------------------------------------------------------------------------------------------|---------------------------------------------------------------------------------------------------------|---------------------------------|------------------------------|
| Name                                                                                                                      | ARV Drugs Formulated into Fixed Dose Combinations                                                       | Dosing Recommendation           | Adverse Events               |
| Genvoya                                                                                                                   | Elvitegravir (150 mg)/cobicistat (150 mg)/tenofovir alafenamide (10 mg)/emtricitabine (200 mg)          | One tablet once daily with food | Nausea, diarrhea, depression |
| Stribild                                                                                                                  | Elvitegravir (150 mg)/cobicistat (150 mg)/tenofovir disoproxil fumarate (300 mg)/emtricitabine (200 mg) | One tablet once daily with food | Nausea, diarrhea, depression |

| INSTI Treatment Strategies for Most Suppressed HIV-1 Patients Undergoing Maintenance Therapy |                                                                                   |                                   |                                                                                                                        |
|----------------------------------------------------------------------------------------------|-----------------------------------------------------------------------------------|-----------------------------------|------------------------------------------------------------------------------------------------------------------------|
| Name                                                                                         | ARV Drugs Formulated into Fixed Dose Combinations                                 | Dosing Recommendation             | Adverse Events                                                                                                         |
| Dovato*                                                                                      | Dolutegravir (50 mg)/lamivudine (300 mg)                                          | One tablet once daily             | Insomnia, headache, weight gain, hepatotoxicity, depression, slightly increased risk of neural tube defects in infants |
| Juluca                                                                                       | Dolutegravir (50 mg)/rilpivirine (25 mg)                                          | One tablet once daily with a meal | Insomnia, headache, weight gain, hepatotoxicity, depression, slightly increased risk of neural tube defects in infants |
| Isentress HD plus Truvada                                                                    | Raltegravir (600mg)/tenofovir disoproxil fumarate (300 mg)/emtricitabine (200 mg) | Two tablets once daily            | Nausea, weight gain, insomnia, depression, rash                                                                        |
| Triumeq                                                                                      | Dolutegravir (50 mg)/abacavir (600 mg)/lamivudine (300 mg)                        | One tablet twice daily            | Insomnia, headache, weight gain, hepatotoxicity, depression, slightly increased risk of neural tube defects in infants |
| Biktarvy                                                                                     | Bictegravir (50 mg)/tenofovir alafenamide (25 mg)/emtricitabine (200 mg)          | One tablet once daily             | Diarrhea, nausea, headache, weight gain                                                                                |
